# Supplementary material
Source: PubMed Central journal article supplement (PMC6985730)
Supplement: AAC.01415-19-s0001.pdf [file AAC.01415-19-s0001.pdf]

## 1 **SUPPLEMENTARY METHODS**

### 2 **Sample and metadata collection**

3 Fecal samples were collected from November of 2013 until April of 2015 from all acute  
4 leukemia patients hospitalized at the Hospital La Fe (Valencia, Spain) who agreed to  
5 participate in this study. Sampling was performed weekly during every hospitalization  
6 period that each patient underwent, allowing us to obtain several samples for each  
7 patient. Samples were kept at 4°C for less than 24 h. Subsequently, fecal samples were  
8 resuspended in autoclave-sterilized PBS 15% glycerol (~200mg/ml) in order to  
9 preserve viability of bacteria upon freezing and kept at -80°C until further processing.  
10 Notably, no differences in the intestinal MRE levels were detected if fecal samples were  
11 cultured immediately or after thawing from being frozen at -80°C (N= 30 samples  
12 tested; p= 0,412; two-tailed paired t-test).

13 Patient related metadata was prospectively collected and recorded in a computerized  
14 database in Access®. The metadata collected included antibiotic and antifungal  
15 treatments, neutropenia status, mucositis development, parenteral feeding, type of  
16 leukemia, reason of hospital admission (i.e. chemotherapy, transplant, infection, graft  
17 versus host disease), gender and age. Blood was drawn daily, during the time a patient  
18 was hospitalized, and neutrophils were counted in order to determine if patient was  
19 neutropenic. Neutropenia was defined as having less than 500 absolute neutrophil  
20 counts per µl of blood.

21 Due to the type of analysis performed (dynamics of MRE levels across time), we  
22 included only patients from which we had collected 2 or more samples during the same  
23 hospitalization period. Five patients were excluded due to the lack of metadata required  
24 for the analysis leaving us with a total of 133 patients.

### 25 **Determination of MRE colonization levels**

26 In order to quantify the levels of MRE, fecal samples stored at -80°C were thawed, 10-  
27 fold diluted in PBS and plated in Brilliance ESBL Agar plates (Oxoid), which contain a 3<sup>rd</sup>

28 generation cephalosporin as selective agent. These plates allow for isolation of Extended  
29 Spectrum Beta-Lactamase producing organisms, while inhibiting the growth of non-  
30 ESBL Enterobacteriaceae and most AmpC organisms, allowing for identification of ESBL-  
31 producing *E. coli* and the *Klebsiella*, *Enterobacter*, *Serratia* and *Citrobacter* group (known  
32 as KESC). Brilliance ESBL Agar plates were chosen for isolation and quantification of  
33 MRE due to the clinical relevance of acquisition of bacterial resistance to 3<sup>rd</sup> generation  
34 cephalosporins. Besides 10-fold dilutions, 100 µl of the original non-diluted sample  
35 (resuspended in PBS 15% glycerol) was also plated in these types of plates. Plates were  
36 incubated for 24 h at 37°C. If no growth was observed, the plate was left for additional  
37 24 h at 37°C in order to confirm the negative result. The number of colonies in each  
38 plate was normalized by dilution and fecal weight in order to calculate the levels of  
39 colonization of MRE per gram of feces.

#### 40 **Characterization of MRE isolates from patients' fecal samples**

41 In order to confirm that the detected colonies were MRE, 5 isolated colonies from each  
42 sample were subjected to taxonomic identification through MALDI-TOF MS, including, if  
43 present, colonies that had a different color and/or morphology. In addition, the  
44 antibiotic resistant pattern was determined through the Vitek 2 system, using the  
45 antimicrobial susceptibility testing cards for Enterobacteriaceae. Antibiotics tested  
46 include amikacin, amoxicillin-clavulanic acid, ampicillin, cefepime, cefotaxime, ceftazidime,  
47 ceftazidime, cefuroxime, ciprofloxacin, gentamicin, imipenem, ertapenem, piperacillin-  
48 tazobactam, tigecycline, and trimethoprim-sulfamethoxazole (cotrimoxazole). The  
49 susceptibility was determined according to the Clinical and Laboratory Standards  
50 Institute Guidelines (2016). In addition, resistance to meropenem was evaluated using  
51 ETEST antibiotic gradient strips (bioMérieux) in strains isolated from patients that had  
52 received meropenem (before and after treatment initiation).

53 An isolate was considered multidrug resistant (MRE) if it was non-susceptible to at least  
54 1 agent in 3 or more antimicrobial categories defined by Magiorakos and co-workers (1),

55 not taking into account those antibiotics for which the bacterium is intrinsically  
56 resistant. All characterized isolates fulfilled the definition of MRE.

57 Production of extended spectrum beta-lactamases was confirmed in a subset of MRE  
58 isolates (Supplementary Table 11, Figure 4) through Double Disk Synergy Test (DDST)  
59 as described in the EUCAST guidelines (“Antimicrobial susceptibility testing EUCAST  
60 disk diffusion method”) and interpreted according to the “EUCAST guidelines for the  
61 detection of resistance mechanisms and specific resistances of clinical and/or  
62 epidemiological importance”. When DDST was insufficient for the verification of ESBL  
63 phenotype, a genotypic confirmation test was performed as previously described (2).

#### 64 **Multivariate regression analysis**

65 For confirming the independent association between MRE levels and the clinical  
66 variables under study, multivariate regression analysis was performed on all variables  
67 collected from patients (i.e. antibiotics, antifungals, neutropenia, parenteral nutrition,  
68 mucositis, type of admission, gender, age and type of leukemia). Lasso regression  
69 implemented in Matlab with positive penalty term  $\lambda$  was applied in order to achieve a  
70 sparse solution. This allowed selection of those variables that are independently  
71 associated with the change in MRE levels.

72 P values lower than 0.05 were considered statistically significant.

73

74

75

76

77

78

79

80

81

82 **SUPPLEMENTARY FIGURES**

83

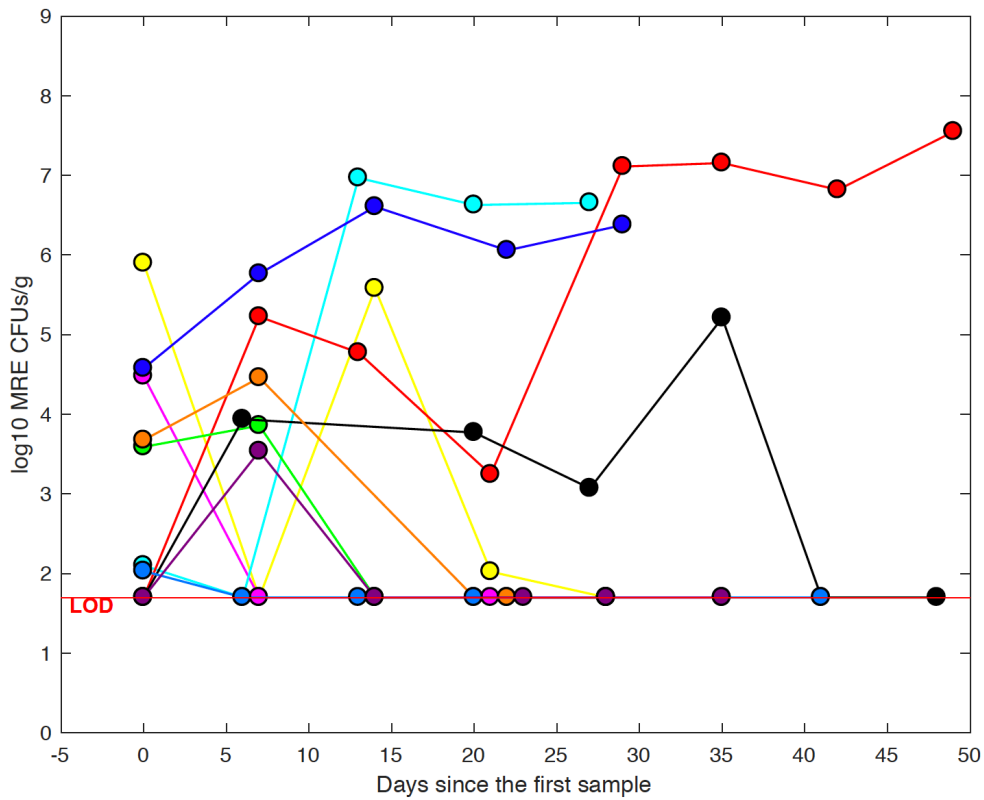

84 **Supplementary Figure 1. Changes in MRE levels in acute leukemia patients**  
85 **during hospitalization.** MRE levels in samples collected during a patient's  
86 hospital admission are shown. Levels from the same patient are connected with a  
87 line. Different patients are labeled with different colors. The figure shows only  
88 patients with more than 4 samples collected during the same hospital admission  
89 period after MRE detection. LOD= limit of detection. N= 10 patients.

91  
92  
93  
94  
95  
96  
97  
98  
99

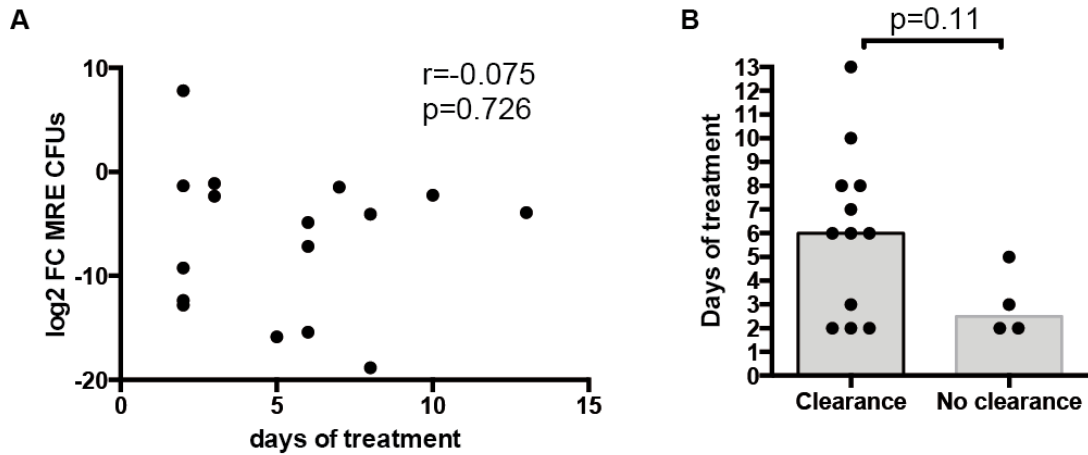

100  
101  
102  
103  
104  
105  
106  
107  
108  
109  
110  
111  
112  
113  
114  
115  
116  
117

**Supplementary Figure 2. Effect of Meropenem/PTZ treatment length on the changes in MRE levels of susceptible strains.** (A) Spearman correlation analysis between (i) the MRE Log<sub>2</sub> Fold change between consecutive samples of the pair, collected before and after the initiation of a Meropenem and/or PTZ treatment and (ii) the length of the treatment (i.e. from the date of initiation until the date of collection of the second sample, since all treatments were administered beyond the second sample was collected). Note that only pairs of samples containing exclusively strains that are susceptible to the administered beta-lactams are included in the analysis. N=16 pairs of samples from 15 patients. (B) Comparison (two-sided Wilcoxon test) of treatment length between pairs of samples included in Figure A in which MRE strains could be detected in the second sample of the pair (not clearance) or could not be detected (clearance). N= 4-12 pairs of samples per group.

MRE (*E. coli*)

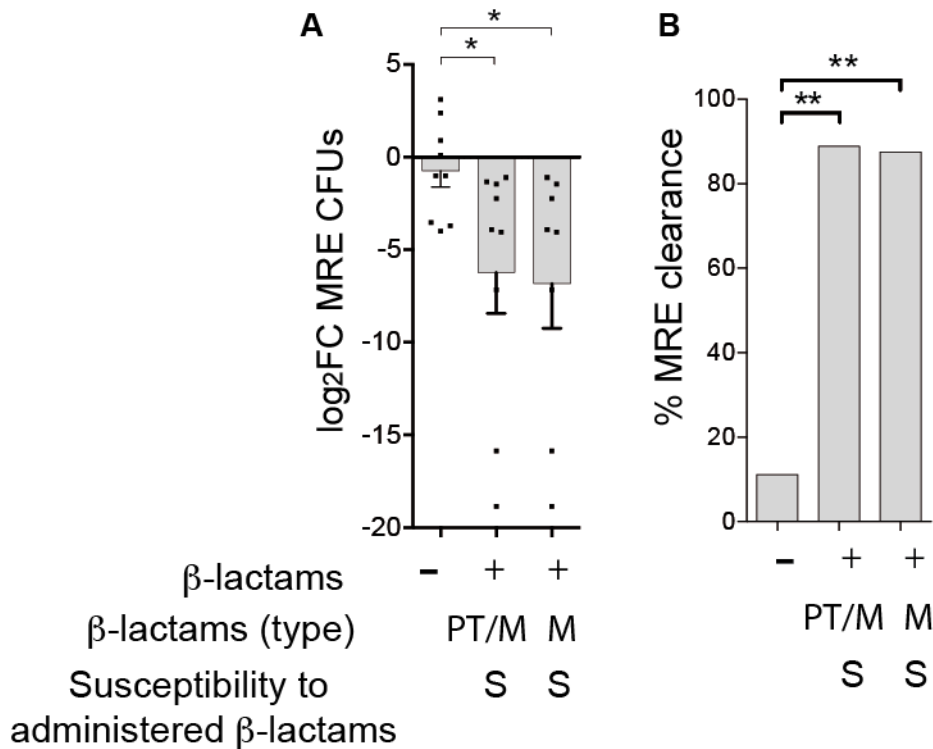

118

119

120 **Supplementary Figure 3. Beta-lactams (i.e. piperacillin-tazobactam, meropenem)**

121 **reduce the fecal levels of multidrug-resistant *E. coli* susceptible to the antibiotic**

122 **administered. (A)** Multidrug-resistant *E. coli* log<sub>2</sub>FC among pairs of consecutive

123 samples in which a beta-lactam (i.e. piperacillin-tazobactam (PT) and/or meropenem

124 (M)) was administered (+) or not (-). Only pairs of samples containing exclusively *E. coli*

125 strains susceptible to the administered beta-lactam are included in the groups PT/M or

126 M. Pairs of samples in which exclusively the beta-lactam meropenem was administered

127 are shown in the M group. Due to the low number of pairs of samples (N=1), the

128 individual effect of piperacillin-tazobactam on MRE (*E. coli*) levels could not be

129 evaluated. Only pairs of samples exclusively colonized with MREs classified as *E. coli* are

130 included in the analysis. **(B)** % of pairs of samples shown in (A) in which MRE could not

131 be detected in the second sample of the pair. \* p<0.05; \*\* p<0.01; Two-tailed t-test (A)

132 or Fischer test (B) comparing with the group of samples in which a beta-lactam was not

133 administered. The number of pairs of samples (S) and patients (P) included in each

134 group are: no beta-lactam (S=9, P=7); susceptible to beta-lactams (S=9, P=9);  
 135 susceptible to meropenem (S=8, P=8).

136  
 137  
 138

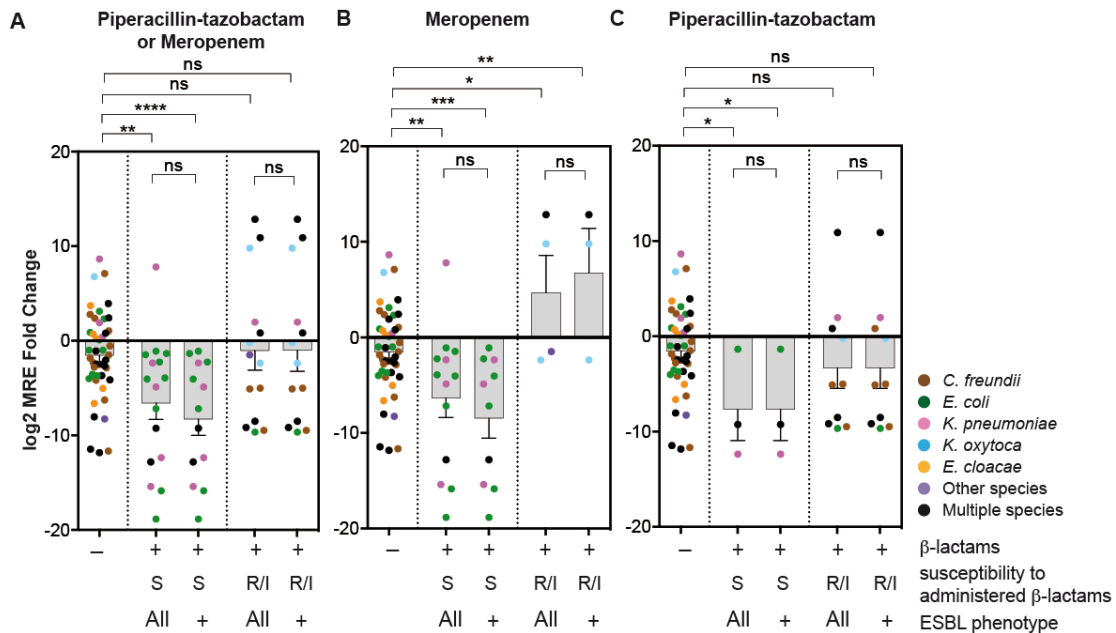

139  
 140  
 141

142 **Supplementary Figure 4. Impact of IV beta-lactams (piperacillin-tazobactam and**

143 **meropenem) on MRE fecal levels that are ESBL producers depends on the MRE**

144 **resistance profile. (A) MRE log<sub>2</sub>FC among pairs of consecutive samples between which**

145 a beta-lactam (i.e. piperacillin-tazobactam or meropenem) was administered (+) or not

146 (-). MRE strains detected in the consecutive pairs of samples were either susceptible (S),

147 or non-susceptible (R/I) towards the administered beta-lactam. ESBL phenotype was

148 determined. Data bars are displayed separately for ESBL (+) and both ESBL/non-ESBL

149 strains (All). (B, C) Same as in (A) but only including pairs of samples in which the beta-

150 lactam therapy initiated between the samples of the pair was exclusively meropenem

151 (B) or exclusively piperacillin-tazobactam (C). \*P<0.05; \*\*P<0.01; \*\*\*P<0.001;

152 \*\*\*P<0.0001 two-tailed t-test compared with the group not receiving beta-lactams. The

153 results show that beta-lactams (i.e. meropenem and piperacillin-tazobactam) reduce the

154 levels of MRE strains susceptible to the beta-lactam administered, even if they are

155 producers of ESBL. Colors indicate the taxonomy of the MRE identified in each pair of  
156 samples. Detailed taxonomy and antibiotic resistant pattern of all the MREs identified  
157 within each pair of samples is shown in Supplementary Table 11. The number of pairs of  
158 samples (S) and patients (P) included in each group are: no beta-lactam (S=46, P=27);  
159 susceptible to beta-lactams All (S=16, P=15); susceptible to beta-lactams ESBL+ (S=13,  
160 P=12); non-susceptible to beta-lactams All (S=14, P=9); non-susceptible to beta-lactams  
161 ESBL+ (S=13, P=9); susceptible to meropenem All (S=13, P=13); susceptible to  
162 meropenem ESBL+ (S=10, P=10); non-susceptible to meropenem All (S=4, P=3); non-  
163 susceptible to meropenem ESBL+ (S=3, P=2); susceptible to PTZ All (S=3, P=3);  
164 susceptible to PTZ ESBL+ (S=3, P=3); non-susceptible to PTZ All (S=10, P=8); non-  
165 susceptible to PTZ ESBL+ (S=10, P=8).

166  
167  
168  
169  
170  
171  
172  
173  
174  
175  
176  
177  
178  
179  
180  
181  
182  
183  
184



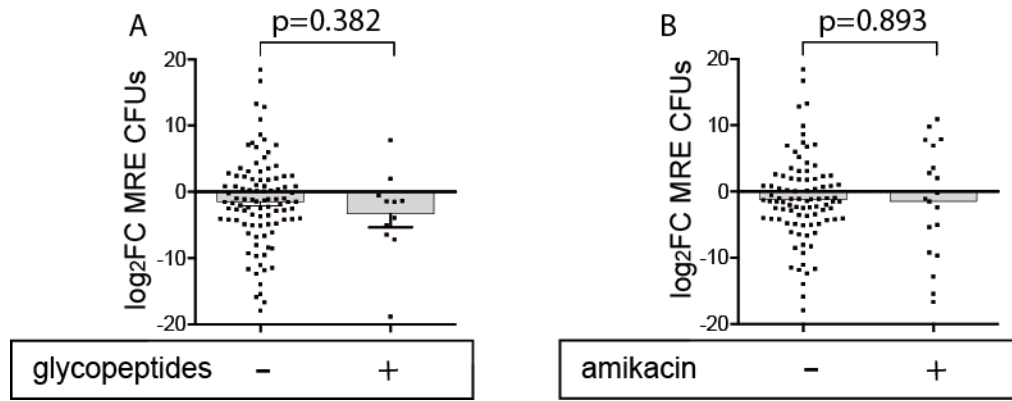

185

186

187 **Supplementary Figure 5. Effect of glycopeptides and aminoglycosides (i.e.**

188 **amikacin) on MRE intestinal levels. (A)** MRE log<sub>2</sub>FC among pairs of consecutive

189 samples in which glycopeptides (i.e. vancomycin, teicoplanin) were administered (+) or

190 not (-). **(B)** Same as in (A) but for the antibiotic amikacin. P values are indicated; Two-

191 tailed t-test. Bar represents the mean, lines represent the SEM. The number of pairs of

192 samples (S) and patients (P) included in each group are: no glycopeptides (S=99, P=48);

193 glycopeptides (S=11, P=11); no amikacin (S=91, P=46); amikacin (S=19, P=16).

194

195

196

197

198

199

200

201

202

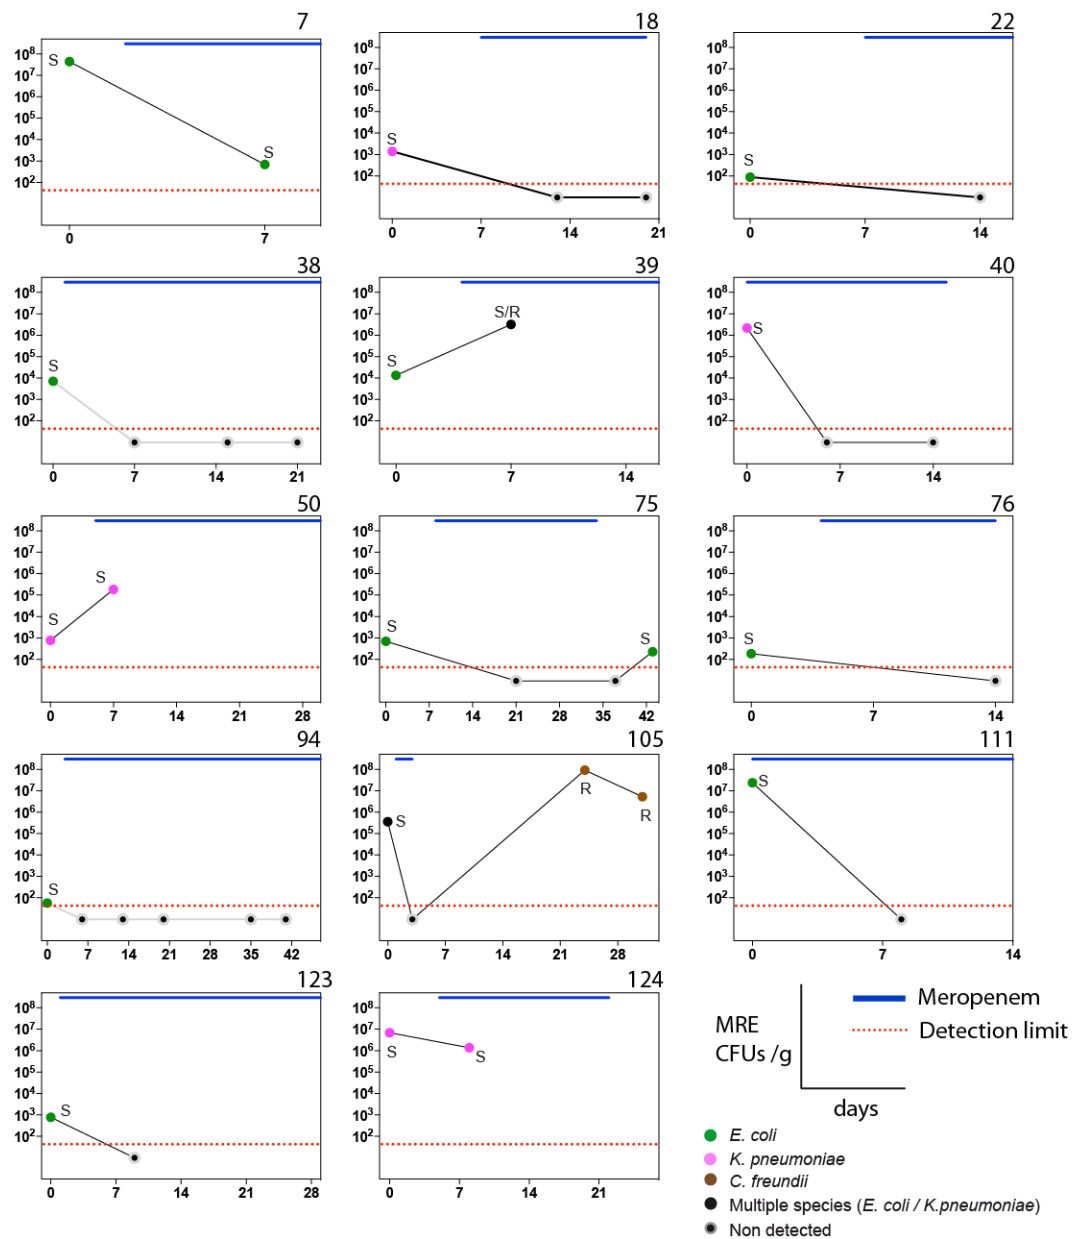

213 phenotype. Colors indicate the taxonomy of the MRE identified in each sample. Days are  
214 relative to the date of the first sample included in the figure for each patient. The length  
215 of the X axis matches the number of days from the first sample included in the figure  
216 until the end of the hospital admission.

217

218

219

220

221

222

223

224

225

226

227

228

229

230

231

232

233

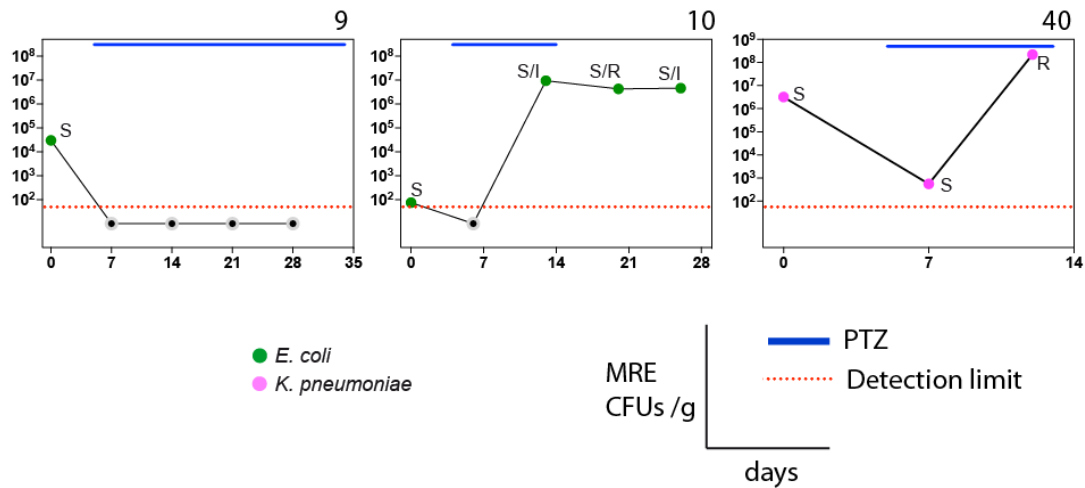

234

235 **Supplementary Figure 7. PTZ decrease fecal levels of susceptible MRE but**

236 **resistant strains emerge.** MRE levels and sensitivity pattern to PTZ before and after

237 the initiation of PTZ therapy. Each panel contains the sample collected before PTZ

238 treatment and all the consecutive samples collected from that specific patient during the

239 same hospital admission period. The ID of each patient is indicated in each panel. The

240 period in which the patient received PTZ is indicated with a blue line. Sensitivity to PTZ

241 is indicated when the MRE could be detected. Note that the first sample contains always

242 MRE strains susceptible to PTZ. S= susceptible, R= resistant, I=intermediate phenotype.

243 Colors indicate the taxonomy of the MRE identified in each sample. Days are relative to

244 the date of the first sample included in the figure for each patient. The length of the X

245 axis matches the number of days from the first sample included in the figure until the

246 end of the hospital admission.

247

248

249

250

251

252

253

254

255

256

257

258 **SUPPLEMENTARY TABLES**

259 **Supplementary Table 1. Characteristics of 133 acute leukemia patients included**

260 **in the study<sup>a</sup>.**

| Parameter               | No. (%)   |
|-------------------------|-----------|
| <b>Age (years)</b>      |           |
| <30                     | 15 (11.3) |
| 30-39                   | 22 (16.5) |
| 40-49                   | 29 (21.8) |
| 50-59                   | 32 (24.1) |
| >59                     | 35 (26.3) |
| <b>Gender</b>           |           |
| Male                    | 72 (54.1) |
| Female                  | 61 (45.9) |
| <b>Type of leukemia</b> |           |
| Myeloid                 | 98 (73.7) |
| Lymphoid                | 31 (23.3) |
| Biphenotypic            | 4 (3)     |

261 <sup>a</sup> Numbers in parenthesis represent % of total patients.

262

263

264

265

266

267

268

269

270

271

272

273

274

275

276

277

278

279

280

281

282

283  
284  
285  
286

**Supplementary Table 3. Characteristics of the 422 hospital admissions included in the study<sup>a</sup>.**

| <b>Parameter</b>                        |            |
|-----------------------------------------|------------|
| <b>Cause of admission</b>               | No. ( %)   |
| Chemotherapy                            | 226 (53.6) |
| Transplant                              | 76 (18)    |
| Infection                               | 89 (21.1)  |
| Other <sup>b</sup>                      | 31 (7.3)   |
| <b>Antibiotics received<sup>c</sup></b> | No. ( %)   |
| <b>Quinolones</b>                       | 285 (67.5) |
| Ciprofloxacin                           | 270 (64)   |
| Other quinolones <sup>d</sup>           | 21 (5)     |
| <b>Glycopeptides</b>                    | 164 (38.9) |
| Vancomycin                              | 151 (35.8) |
| Teicoplanin                             | 25 (5.9)   |
| <b>Beta-lactams</b>                     | 306 (72.5) |
| <i>Piperacillin-tazobactam</i>          | 190 (45)   |
| Meropenem                               | 187 (44.3) |
| Other beta-lactams <sup>d</sup>         | 36 (8.5)   |
| <b>Aminoglycosides</b>                  | 132 (31.3) |
| Amikacin                                | 132 (31.3) |
| Other aminoglycosides <sup>d</sup>      | 3 (0.7)    |
| <b>Others</b>                           | 120 (28.4) |
| Linezolid                               | 79 (18.7)  |
| Metronidazole                           | 11 (2.6)   |
| Colistin                                | 25 (5.9)   |
| Tigecycline                             | 12 (2.8)   |

287 <sup>a</sup> Numbers in parenthesis represent % of total admissions. Antibiotics variables are not  
288 mutually exclusive and do not sum to 100%.

289 <sup>b</sup> Other causes of admission include: treatment related complications such as graft-  
290 versus-host disease, organ toxicities, diagnostic procedures and other diseases non  
291 related to leukemia.

292 <sup>c</sup> Number of hospital admissions in which a specific antibiotic was administered

293 <sup>d</sup> Other quinolones include levofloxacin and moxifloxacin. Other beta-lactams include  
294 ampicillin, aztreonam, amoxicillin/clavulanic acid, cefepime, ceftazidime, ceftriaxone,  
295 cefuroxime, cloxacillin, ertapenem and imipenem. Other aminoglycosides include  
296 gentamicin and tobramycin.

297

298

299

300

301

302

303

304

305

306

307

308

309

310

311

312

313

314

315

316

317

318

319

320

321

322

323

324

325

326

327

328

329

330

331 **Supplementary Table 4. Days of therapy (DOT) per 1000 patient days<sup>a</sup>.**

| <b>Antibiotics received</b>        | Mean DOT/1000 patient days | Median DOT/1000 patient days |
|------------------------------------|----------------------------|------------------------------|
| <b>Quinolones</b>                  | 350.75                     | 304.76                       |
| Ciprofloxacin                      | 329.5                      | 284.21                       |
| Other quinolones <sup>b</sup>      | 25.32                      | 0                            |
| <b>Glycopeptides</b>               | 132.9                      | 109.09                       |
| Vancomycin                         | 114.8                      | 78.01                        |
| Teicoplanin                        | 19.81                      | 0                            |
| <b>Beta-lactams</b>                | 562.64                     | 578.95                       |
| <i>Piperacillin-tazobactam</i>     | 252.25                     | 225.81                       |
| Meropenem                          | 288.38                     | 230.77                       |
| Other beta-lactams <sup>b</sup>    | 36.49                      | 0                            |
| <b>Aminoglycosides</b>             | 104.38                     | 59.7                         |
| Amikacin                           | 103.35                     | 59.7                         |
| Other aminoglycosides <sup>b</sup> | 1.03                       | 0                            |
| <b>Others</b>                      | 122.91                     | 56.6                         |
| Linezolid                          | 76.92                      | 0                            |
| Metronidazole                      | 14.43                      | 0                            |
| Colistin                           | 26.84                      | 0                            |
| Tigecycline                        | 9.19                       | 0                            |

332 <sup>a</sup> Numbers represent mean/median value across patients for days in which a patient  
333 received an antibiotic treatment, divided by total days that patient was in hospital and  
334 multiplied by 1000.

335 <sup>b</sup> Other quinolones include levofloxacin and moxifloxacin. Other beta-lactams include  
336 ampicillin, aztreonam, amoxicillin/clavulanic acid, cefepime, ceftazidime, ceftriaxone,  
337 cefuroxime, cloxacillin, ertapenem and imipenem. Other aminoglycosides include  
338 gentamicin and tobramycin.

339

340

341

342

343

344

345



346

347

Supplementary Table 7. Summary of the antibiotic resistant patterns of the

348

isolated MREs

|                                                               | <b>Total<br/>MRE<sup>a</sup></b> | <b><i>E. coli</i><sup>b</sup></b> | <b><i>C.<br/>freun<br/>dii</i></b> | <b><i>K.<br/>pneu<br/>monia<br/>e</i></b> | <b><i>K.<br/>oxytoc<br/>a</i></b> | <b><i>E.<br/>cloaca<br/>e</i></b> | <b><i>M.<br/>morg<br/>anii</i></b> | <b><i>C.<br/>amalo<br/>naticu<br/>s</i></b> |
|---------------------------------------------------------------|----------------------------------|-----------------------------------|------------------------------------|-------------------------------------------|-----------------------------------|-----------------------------------|------------------------------------|---------------------------------------------|
| Penicillins <sup>c</sup>                                      |                                  |                                   |                                    |                                           |                                   |                                   |                                    |                                             |
| Ampicillin                                                    | 344<br>(100)                     | 108<br>(100)                      | IR                                 | IR                                        | IR                                | IR                                | IR                                 | 15<br>(100)                                 |
| Penicillins + b-lactamase inhibitors                          |                                  |                                   |                                    |                                           |                                   |                                   |                                    |                                             |
| Amoxicillin-<br>clavulanate                                   | 312<br>(90.7)                    | 77<br>(71.3)                      | IR                                 | 59<br>(100)                               | 22<br>(100)                       | IR                                | IR                                 | 15<br>(100)                                 |
| Antipseudomonal penicillins + $\beta$ -lactamase inhibitors   |                                  |                                   |                                    |                                           |                                   |                                   |                                    |                                             |
| Piperacillin-<br>tazobactam                                   | 283<br>(82.3)                    | 67 (62)                           | 90<br>(100)                        | 47<br>(79.7)                              | 22<br>(100)                       | 23<br>(100)                       | 10<br>(71.4)                       | 15<br>(100)                                 |
| 1 <sup>st</sup> and 2 <sup>nd</sup> generation cephalosporins |                                  |                                   |                                    |                                           |                                   |                                   |                                    |                                             |
| Cefuroxime                                                    | 343<br>(99.7)                    | 107<br>(99.1)                     | 90<br>(100)                        | 59<br>(100)                               | 22<br>(100)                       | 23<br>(100)                       | IR                                 | 15<br>(100)                                 |
| 3 <sup>rd</sup> and 4 <sup>th</sup> generation cephalosporins |                                  |                                   |                                    |                                           |                                   |                                   |                                    |                                             |
| Ceftazidime                                                   | 290<br>(84.3)                    | 67 (62)                           | 90<br>(100)                        | 54<br>(91.5)                              | 21<br>(95.4)                      | 23<br>(100)                       | 11<br>(78.6)                       | 15<br>(100)                                 |
| Cefotaxime                                                    | 321<br>(93.9)                    | 91<br>(84.3)                      | 89<br>(100)                        | 57<br>(96.6)                              | 21<br>(95.4)                      | 23<br>(100)                       | 14<br>(100)                        | 15<br>(100)                                 |
| Cefepime                                                      | 261<br>(76.3)                    | 64<br>(59.3)                      | 85<br>(95.5)                       | 36<br>(61)                                | 20<br>(90.9)                      | 22<br>(95.6)                      | 14<br>(100)                        | 15<br>(100)                                 |
| Cephamycins                                                   |                                  |                                   |                                    |                                           |                                   |                                   |                                    |                                             |
| Cefoxitin                                                     | 257<br>(74.7)                    | 61<br>(56.5)                      | IR                                 | 31<br>(52.5)                              | 21<br>(95.4)                      | IR                                | 6<br>(42.8)                        | 15<br>(100)                                 |
| Carbapenems                                                   |                                  |                                   |                                    |                                           |                                   |                                   |                                    |                                             |
| Imipenem                                                      | 167<br>(48.5)                    | 3 (2,8)                           | 55<br>(97.8)                       | 13<br>(22)                                | 21<br>(95.4)                      | 15<br>(65.2)                      | 3<br>(21.4)                        | 15<br>(100)                                 |
| Ertapenem                                                     | 184<br>(53.5)                    | 11<br>(10.2)                      | 87<br>(96.7)                       | 27<br>(45.8)                              | 20<br>(90.9)                      | 16<br>(69.6)                      | 2<br>(14.3)                        | 15<br>(100)                                 |
| Aminoglycosides                                               |                                  |                                   |                                    |                                           |                                   |                                   |                                    |                                             |

|                           |               |               |              |              |              |              |              |              |
|---------------------------|---------------|---------------|--------------|--------------|--------------|--------------|--------------|--------------|
| Amikacin                  | 29(8.4)       | 6 (5.6)       | 4 (4.4)      | 9<br>(15.2)  | 0            | 1 (4.3)      | 3<br>(21.4)  | 6 (40)       |
| Gentamicin                | 191(55,<br>5) | 22<br>(20.4)  | 73<br>(81.1) | 46<br>(78)   | 20<br>(90.9) | 13<br>(56.5) | 14<br>(100)  | 1 (6.7)      |
| Fluoroquinolones          |               |               |              |              |              |              |              |              |
| Ciprofloxacin             | 298<br>(86.6) | 97<br>(89.8)  | 87<br>(96.7) | 48<br>(81.4) | 20<br>(90.9) | 13<br>(56.5) | 14<br>(100)  | 15<br>(100)  |
| Nalidixic acid            | 310<br>(90.2) | 101<br>(93.5) | 89<br>(100)  | 49<br>(83)   | 20<br>(90.9) | 17<br>(73.9) | 14<br>(100)  | 15<br>(100)  |
| Levofloxacin              | 298<br>(86.6) | 97<br>(89.8)  | 87<br>(96.7) | 48<br>(81.4) | 20<br>(90.9) | 13<br>(56.5) | 14<br>(100)  | 15<br>(100)  |
| Glycylcyclines            |               |               |              |              |              |              |              |              |
| Tigecycline               | 84<br>(24.6)  | 4 (3.7)       | 21<br>(23.6) | 14<br>(23.7) | 19<br>(86.4) | 12<br>(52.2) | IR           | 0            |
| Folate pathway inhibitors |               |               |              |              |              |              |              |              |
| Co-trimoxazole            | 252<br>(73.5) | 84<br>(78.5)  | 61<br>(67.8) | 43<br>(72.9) | 21<br>(95.4) | 14<br>(60.9) | 12<br>(85.7) | 11<br>(73.3) |

349 <sup>a</sup> Number of isolates that have a resistant or intermediate phenotype to the antibiotic  
350 indicated. Numbers in parenthesis represent % of total isolates. Those isolates obtained  
351 from the same sample that had the same taxonomy and resistant pattern were only  
352 considered once in this table.

353 <sup>b</sup> Percentage of resistance is shown for individual species with > 5 identified isolates.  
354 Intrinsic resistance to a certain antibiotic, as defined by Magiorakos and co-workers [1],  
355 is indicated as IR

356 <sup>c</sup> Antimicrobial categories defined by Magiorakos and co-workers are highlighted in grey  
357 [1].

358  
359  
360

361

362

363

364

365

366

367 **SUPPLEMENTARY REFERENCES**

- 368 1. **Magiorakos AP, Srinivasan A, Carey RB, Carmeli Y, Falagas ME, Giske CG,**  
369 **Harbarth S, Hindler JF, Kahlmeter G, Olsson-Liljequist B, Paterson DL, Rice LB,**  
370 **Stelling J, Struelens MJ, Vatopoulos A, Weber JT, Monnet DL.** 2012. Multidrug-  
371 resistant, extensively drug-resistant and pandrug-resistant bacteria: an  
372 international expert proposal for interim standard definitions for acquired  
373 resistance. *Clinical Microbiology and Infection* **18**:268–281.
- 374 2. **Chia JH, Chu C, Su LH, Chiu CH, Kuo AJ, Sun CF, Wu TL.** 2005. Development of a  
375 Multiplex PCR and SHV Melting-Curve Mutation Detection System for Detection of  
376 Some SHV and CTX-M -Lactamases of *Escherichia coli*, *Klebsiella pneumoniae*, and  
377 *Enterobacter cloacae* in Taiwan. *J Clin Microbiol* **43**:4486–4491.

378

379

380
